# Supplementary material for: New Auranofin Analogs with Antibacterial Properties against Burkholderia Clinical Isolates
Source: MDPI journal article supplement (doi:10.3390/antibiotics10121443), 2021-11-24
Supplement: s1 [file s1]

**Table S1.** Minimum inhibitory concentrations (MICs) of group one auranofin derivatives against a panel of *Burkholderia cepacia* complex (Bcc) bacteria.

| Organisms                          | MIC (µg/mL) |              |              |              |              |
|------------------------------------|-------------|--------------|--------------|--------------|--------------|
|                                    | Auranofin   | WB-18-FI3683 | WB-16-EO9899 | WB-19-HG5899 | WB-19-HB2664 |
| <i>B. cenocepacia</i> K56-2        | >128        | >128         | >128         | >128         | >128         |
| <i>B. lata</i> BCC6                | 128         | 128          | 128          | 128          | 128          |
| <i>B. contaminans</i> MF16         | 128         | 128          | 128          | 128          | 128          |
| <i>B. contaminans</i> FFH-2050MA   | 128         | 128          | 128          | 64           | 64           |
| <i>B. dolosa</i> CEP021            | >128        | >128         | >128         | >128         | >128         |
| <i>B. multivorans</i> ATCC 17616   | 128         | 128          | 128          | 128          | 128          |
| <i>B. cenocepacia</i> 140485       | 128         | 64           | 32           | 128          | 128          |
| <i>B. ubonensis</i> LMG 20358      | >128        | >128         | >128         | 128          | 128          |
| <i>B. contaminans</i> FFH-4004     | >128        | >128         | >128         | 128          | 128          |
| <i>B. mallei</i> China 5 (NBL 4)   | 0.25        | ND           | ND           | ND           | ND           |
| <i>B. mallei</i> Ivan (NCTC 10230) | 0.5         | ND           | ND           | ND           | ND           |
| <i>B. mallei</i> China 7 (NBL 7)   | 1           | ND           | ND           | ND           | ND           |
| <i>B. pseudomallei</i> 1710b       | 64          | ND           | ND           | ND           | ND           |
| <i>B. pseudomallei</i> MSHR465a    | 64          | ND           | ND           | ND           | ND           |
| <i>B. pseudomallei</i> HBPUB10134a | 64          | ND           | ND           | ND           | ND           |

The reported MIC values are from three biological replicates. In the case a 2-fold difference occurred, the higher value is reported.

**Table S2.** Bacterial species and strains used in this study.

| Organism                                  | Features                                       | Source                                                       |
|-------------------------------------------|------------------------------------------------|--------------------------------------------------------------|
| <i>B. cenocepacia</i> K56-2               | Cystic fibrosis clinical isolate, ETI2 lineage | (1)                                                          |
| <i>B. lata</i> BCC6                       | Isolated from mirror defogger                  | C. Deschênes                                                 |
| <i>B. contaminans</i> MF16                | Clinical Isolate                               | (2)                                                          |
| <i>B. contaminans</i> FFH-2050MA          | Clinical Isolate                               | Hospital de Niños Ricardo Gutierrez, Buenos Aires, Argentina |
| <i>B. dolosa</i> CEP021                   | Clinical isolate                               | D. Speert                                                    |
| <i>B. multivorans</i> ATCC 17616          | Environmental Isolate                          | Dr. Tiedge                                                   |
| <i>B. cenocepacia</i> 140485              | Clinical Isolate                               | National Microbiology Laboratory                             |
| <i>B. ubonensis</i> LMG 20358             | Surface soil isolate                           | (3, 4)                                                       |
| <i>B. contaminans</i> FFH-4004            | Clinical isolate                               | CF Isolate from Argentina                                    |
| <i>B. mallei</i> China 5 (NBL 4)          | Animal Isolate                                 | BEI Resources                                                |
| <i>B. mallei</i> Ivan (NCTC 10230)        | Animal Isolate                                 | BEI Resources                                                |
| <i>B. mallei</i> China 7 (NBL 7)          | Clinical Isolate                               | BEI Resources                                                |
| <i>B. pseudomallei</i> 1710b              | Clinical Isolate                               | BEI Resources                                                |
| <i>B. pseudomallei</i> MSHR465a           | Clinical Isolate                               | BEI Resources                                                |
| <i>B. pseudomallei</i> HBPUB10134a        | Clinical Isolate                               | BEI Resources                                                |
| <i>B. pseudomallei</i> MSHR305            | Clinical Isolate                               | BEI Resources                                                |
| <i>Stenotrophomonas maltophilia</i> DH57  | Clinical isolate                               | ATCC                                                         |
| <i>Stenotrophomonas maltophilia</i> K279a | Clinical isolate                               | ATCC                                                         |
| <i>Pseudomonas. aeruginosa</i> PA01       | Reference strain                               | A. Kumar                                                     |
| <i>Pseudomonas aeruginosa</i> PA7         | MDR, non-respiratory isolate                   | A. Kumar, (5)                                                |
| <i>Escherichia coli</i> 120955            | ESBL-producing clinical isolate                | G. Zhanel                                                    |

|                                           |                                 |                                                   |
|-------------------------------------------|---------------------------------|---------------------------------------------------|
| <i>Escherichia vulneris</i> CEP511        | Clinical isolate                | D. Speert                                         |
| <i>Klebsiella pneumoniae</i> 120310       | ESBL-producing clinical isolate | G. Zhanel                                         |
| <i>Acinetobacter baumannii</i> ATCC 17978 | Reference strain                | A. Kumar                                          |
| <i>Staphylococcus aureus</i> ATCC 27700   | Reference Strain                | K. Lovetri                                        |
| <i>Staphylococcus aureus</i> 107094       | MRSA, clinical isolate          | Paediatric Hospital of<br>Buenos Aires, Argentina |

---

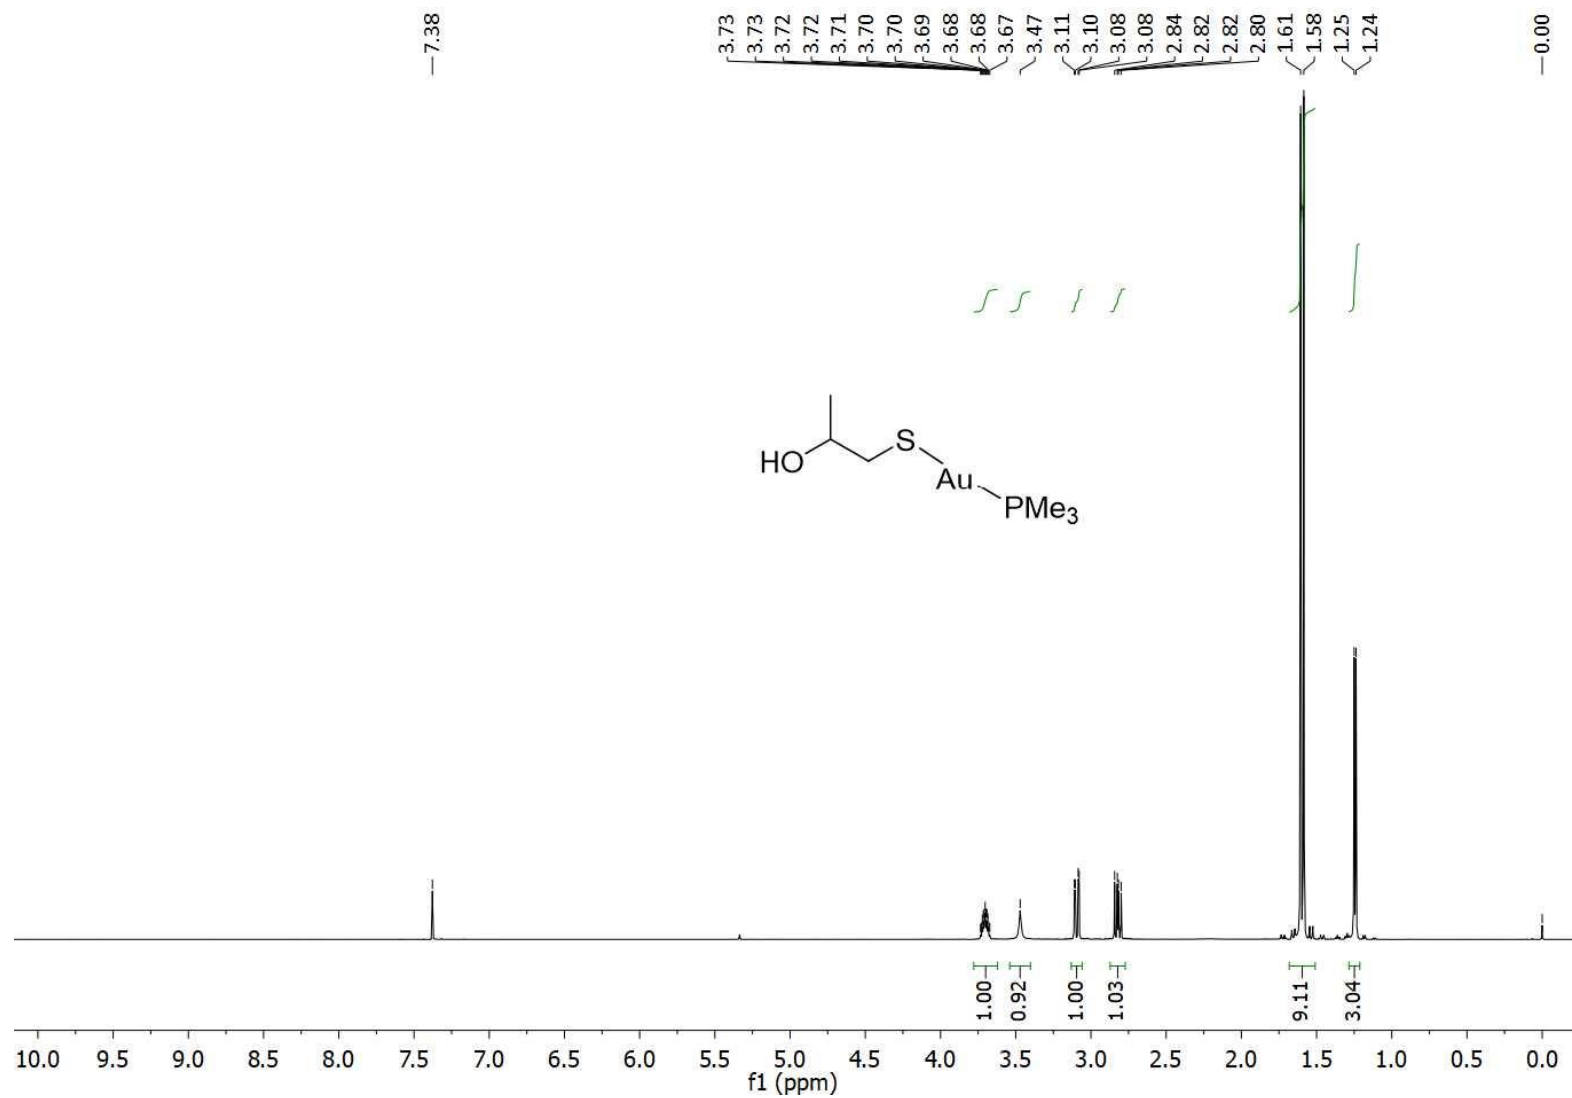

**Figure S1.** <sup>1</sup>H NMR spectrum of compound **WB-19-HL4170** (MS-40S) in CDCl<sub>3</sub>.

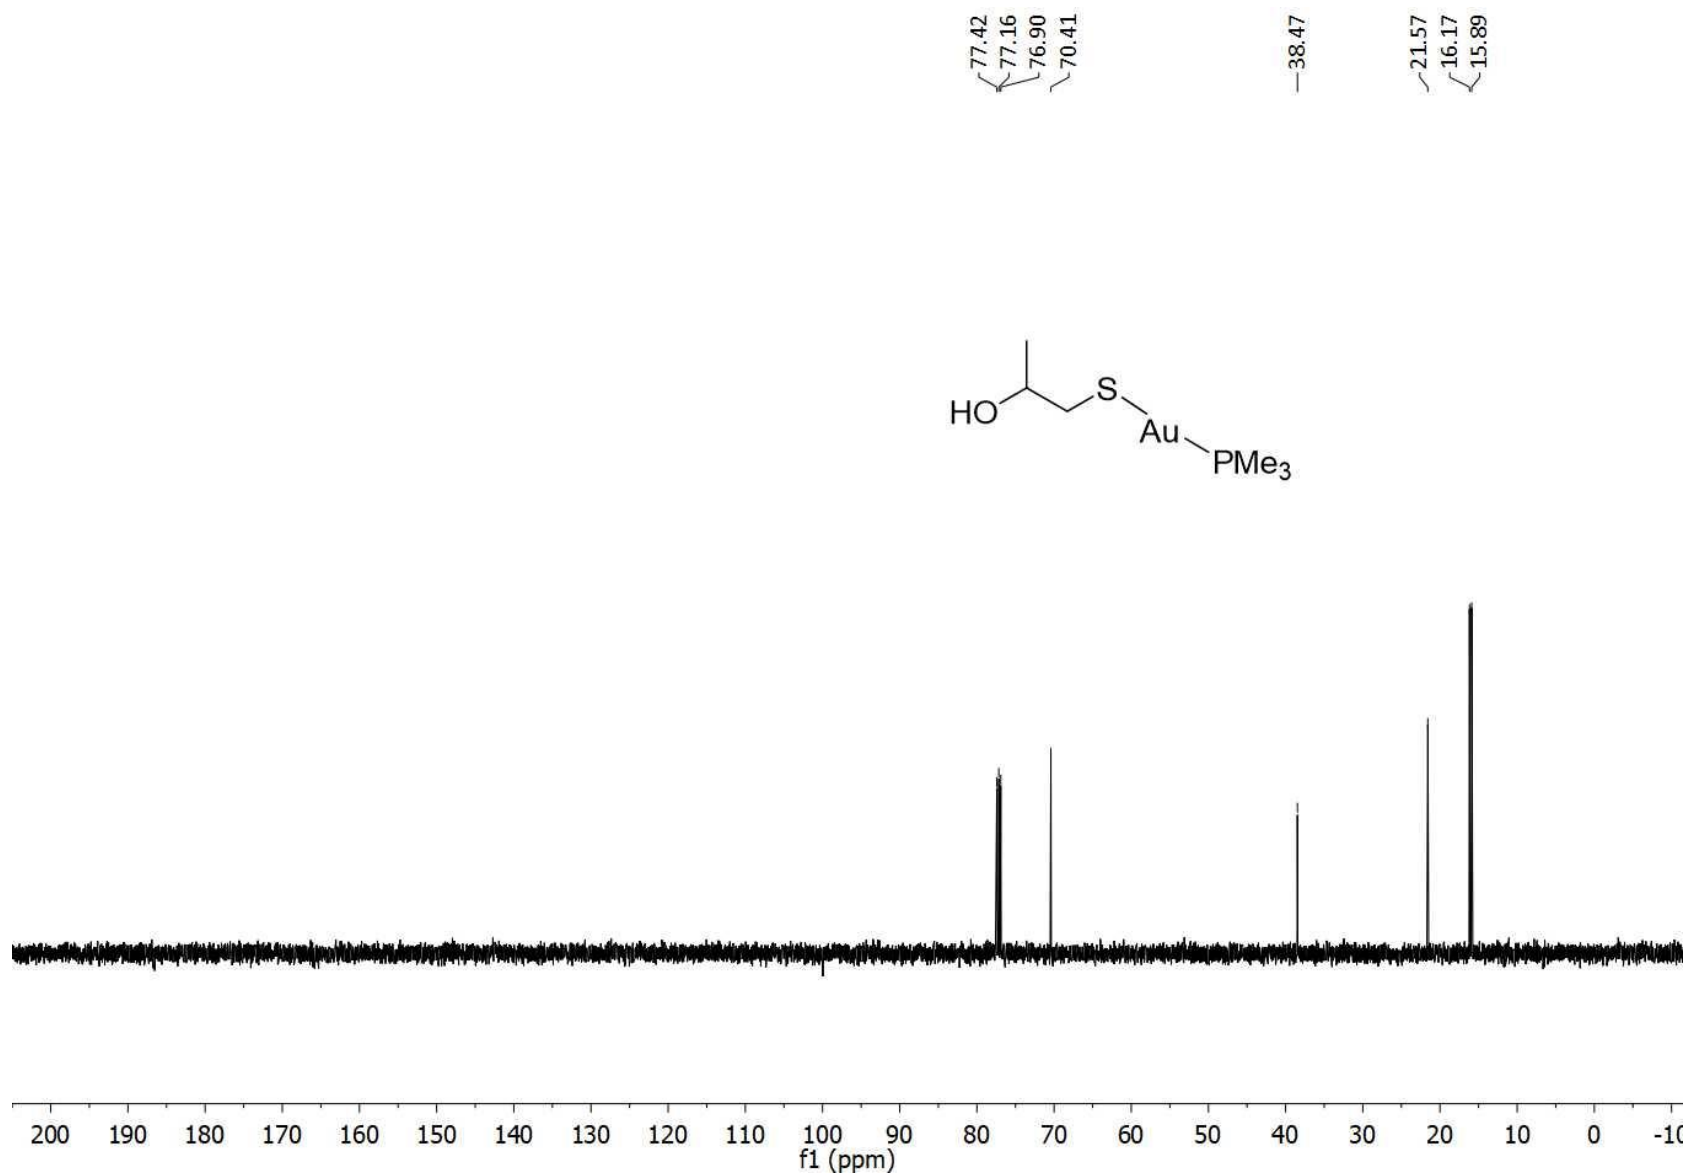

**Figure S2.**  $^{13}\text{C}$  NMR spectrum of compound **WB-19-HL4170** (MS-40S) in  $\text{CDCl}_3$ .

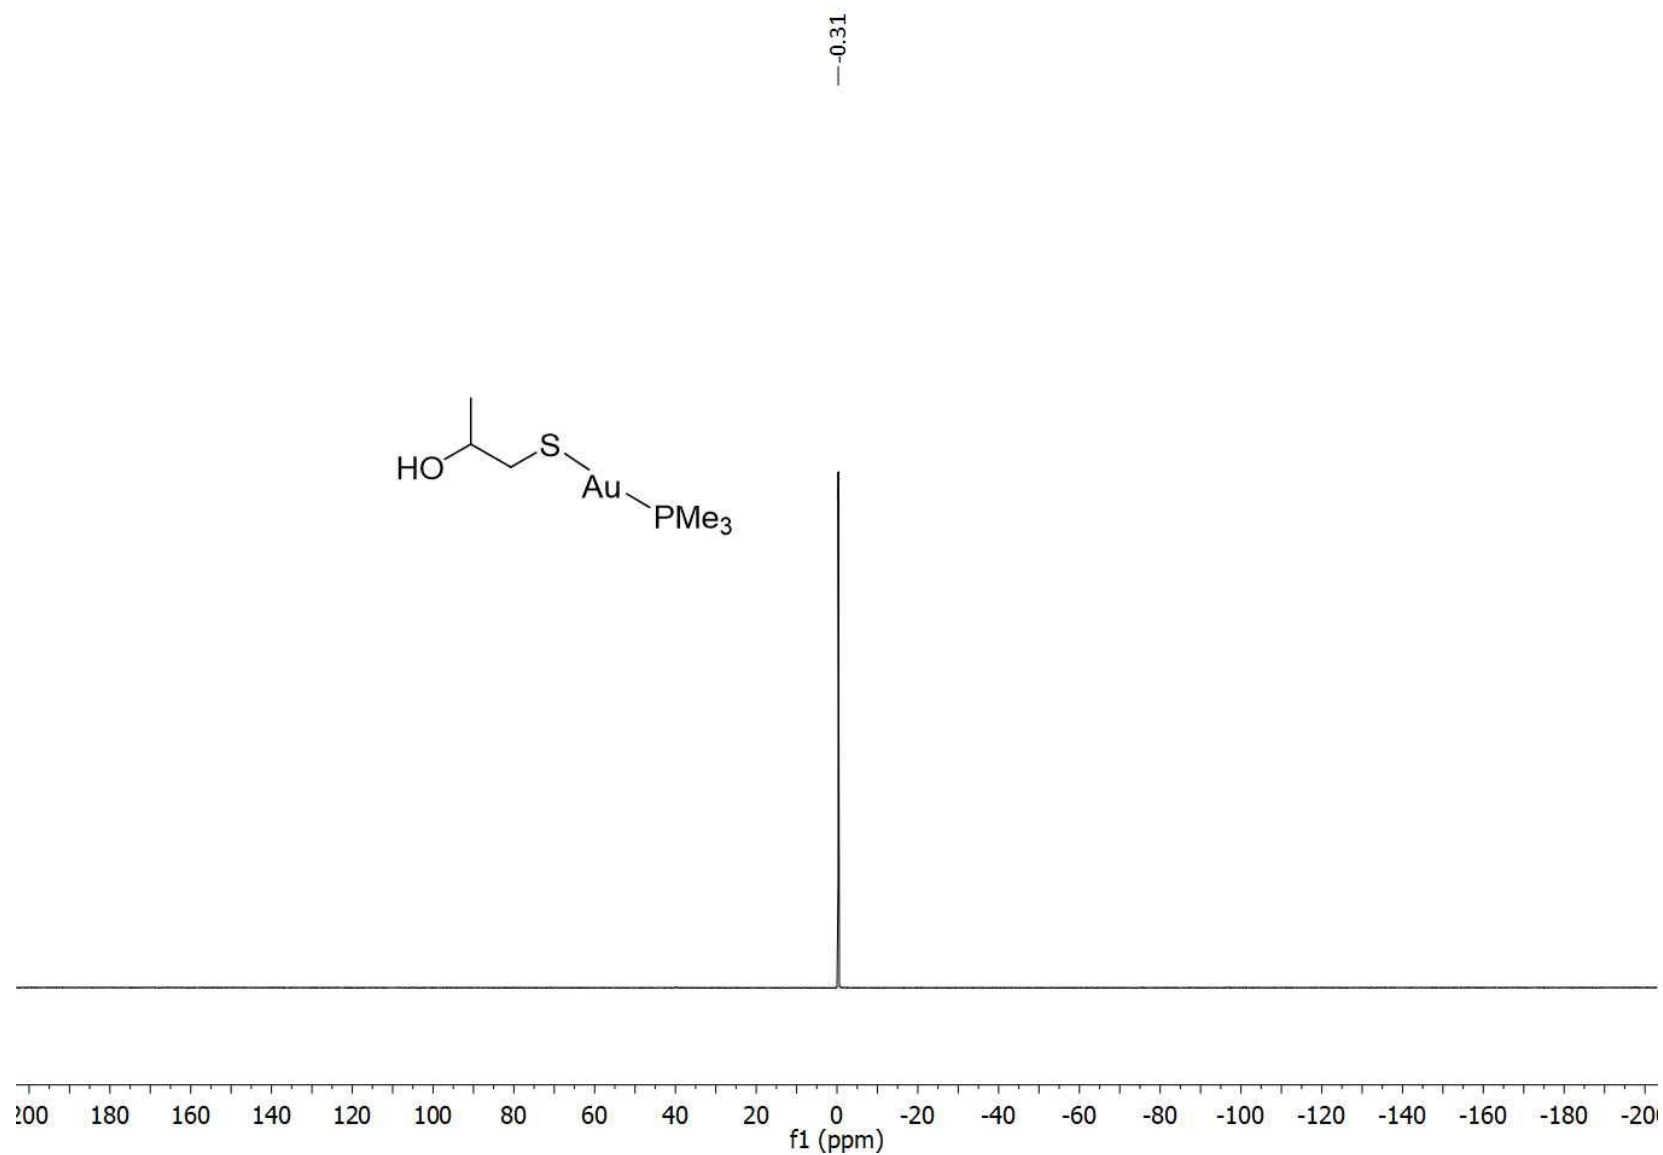

**Figure S3.**  $^{31}\text{P}$  NMR spectrum of compound **WB-19-HL4170** (MS-40S) in  $\text{CDCl}_3$ .

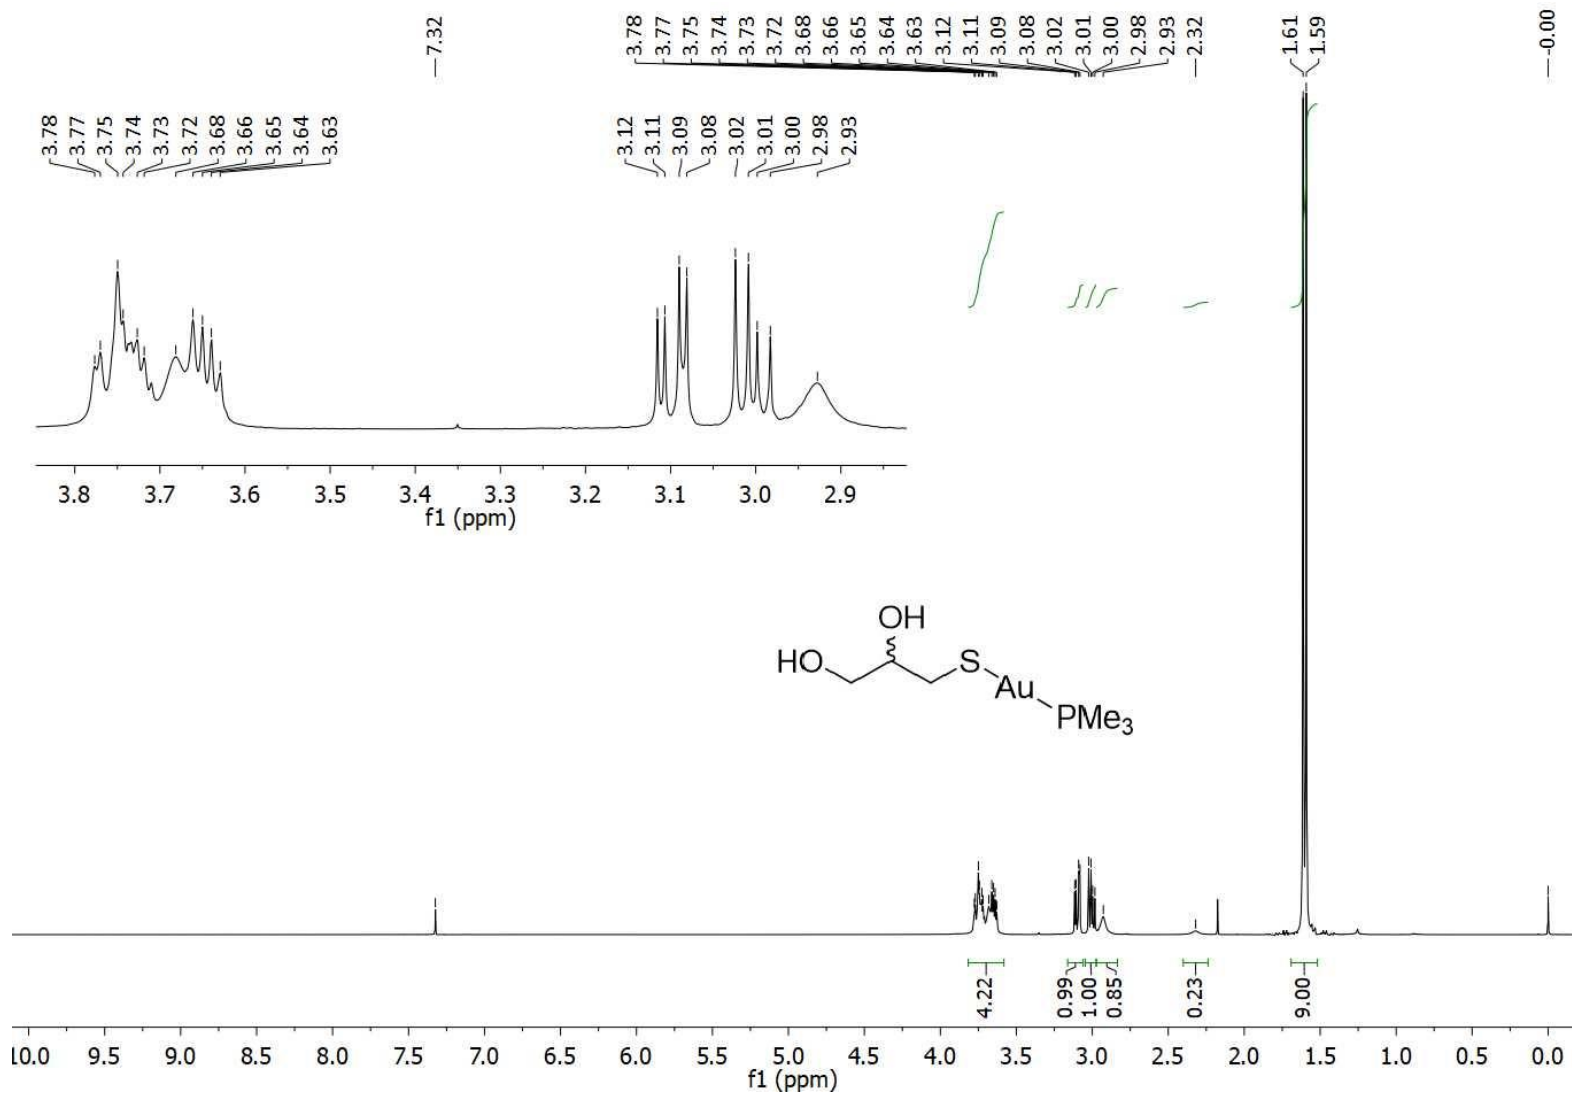

**Figure S4.**  $^1\text{H}$  NMR spectrum of compound **WB-19-HL4171** in  $\text{CDCl}_3$ .

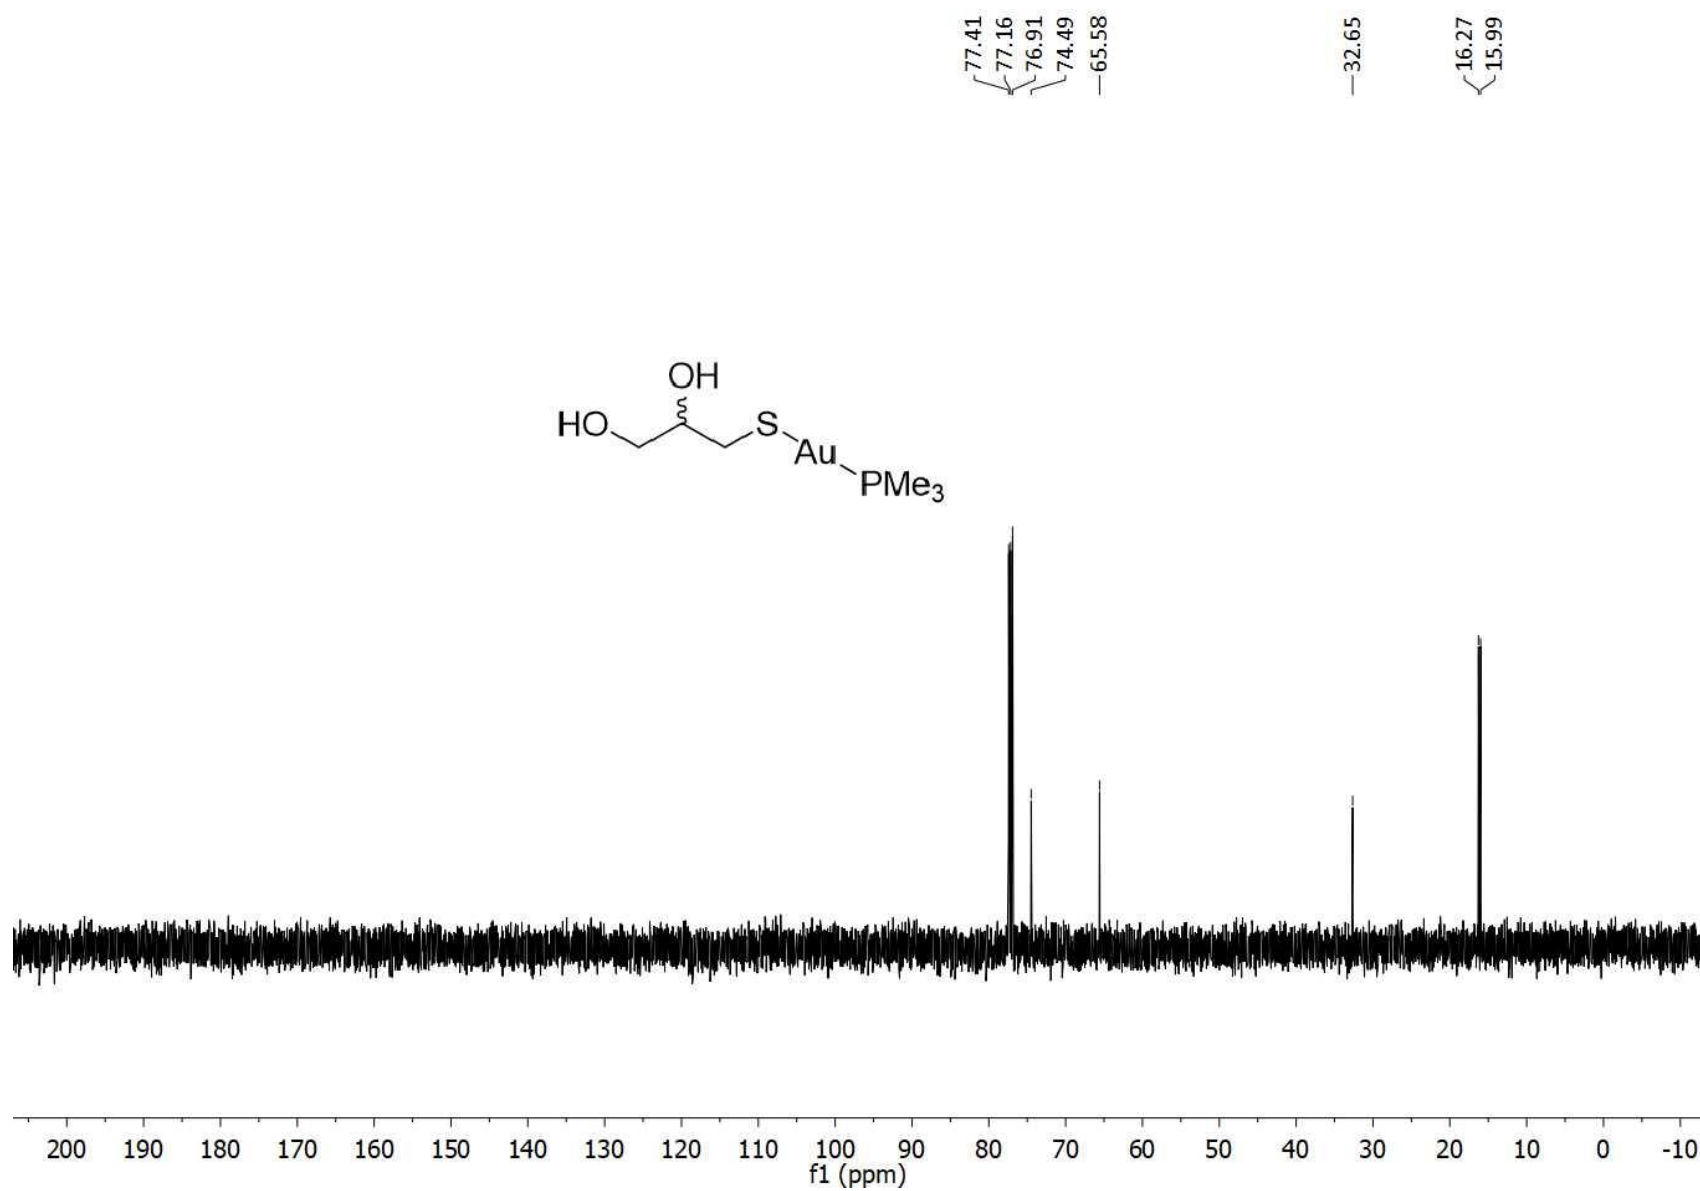

**Figure S5.**  $^{13}\text{C}$  NMR spectrum of compound **WB-19-HL4171** in CDCl<sub>3</sub>.



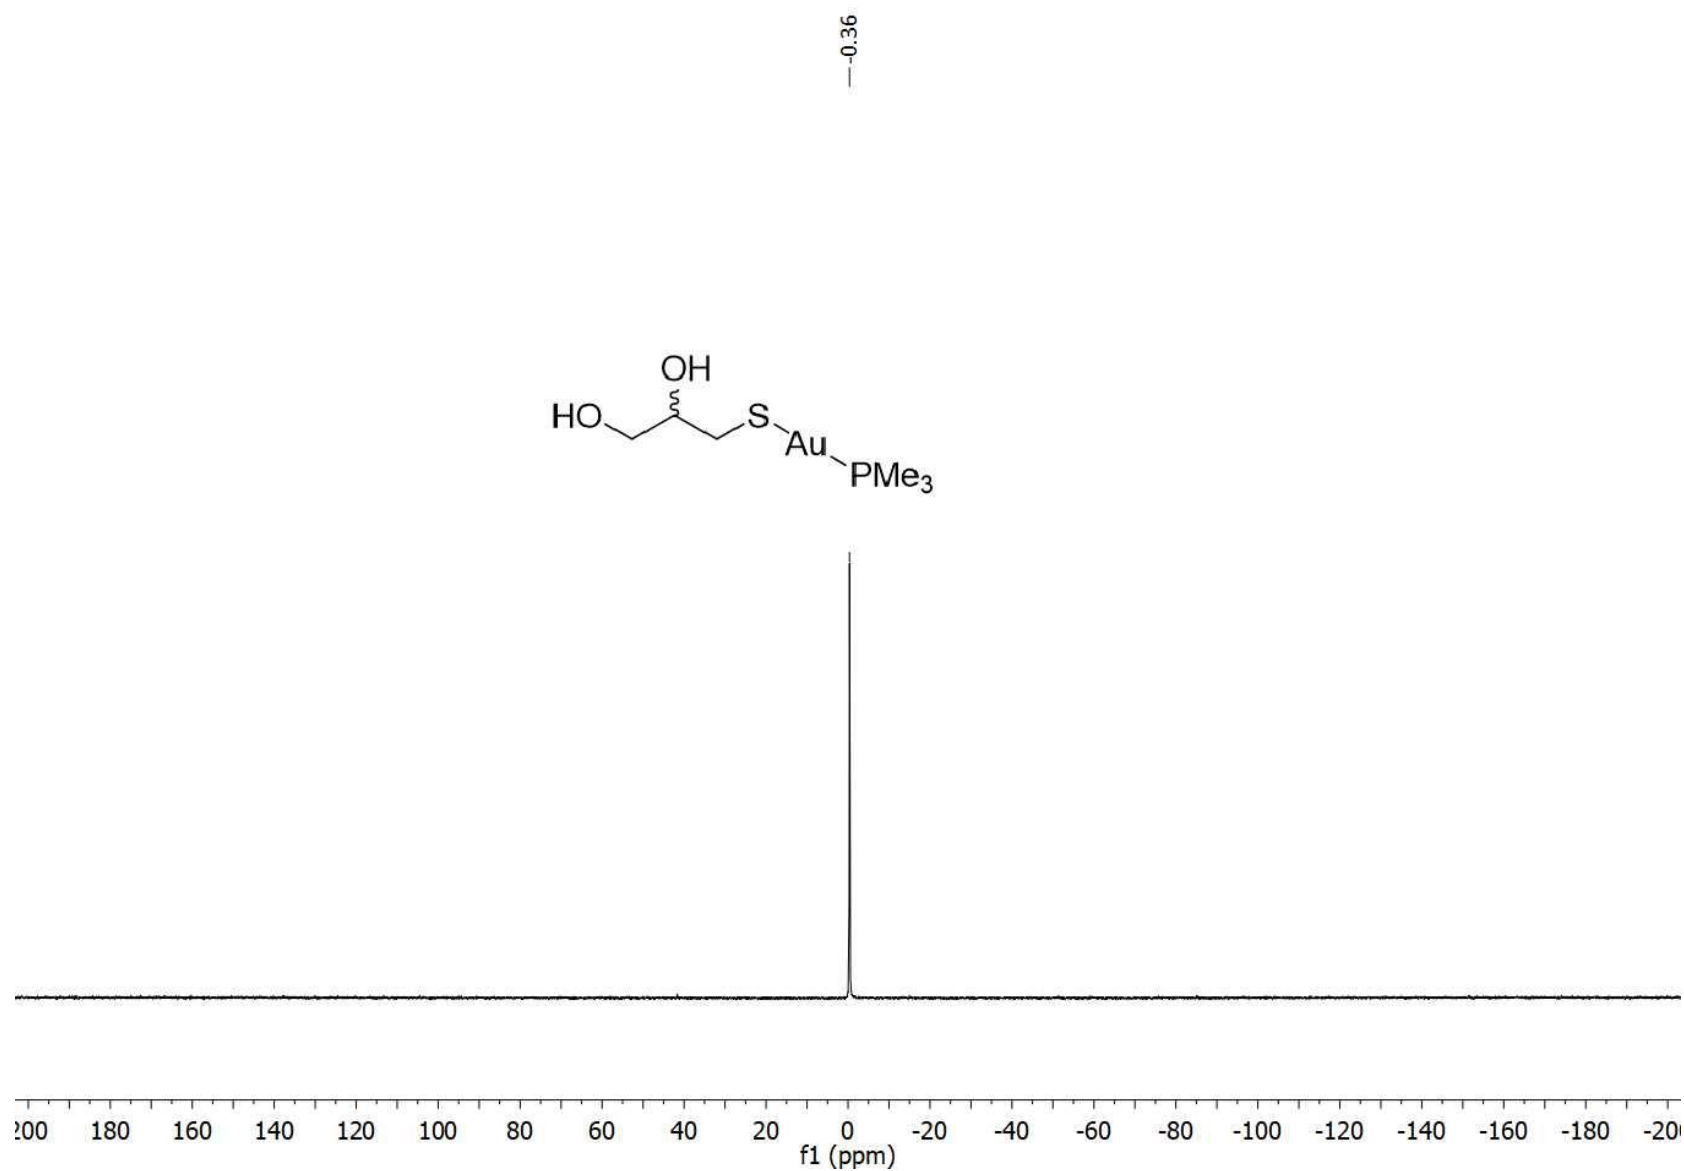

**Figure S6.**  $^{31}\text{P}$  NMR spectrum of compound **WB-19-HL4171** in  $\text{CDCl}_3$ .

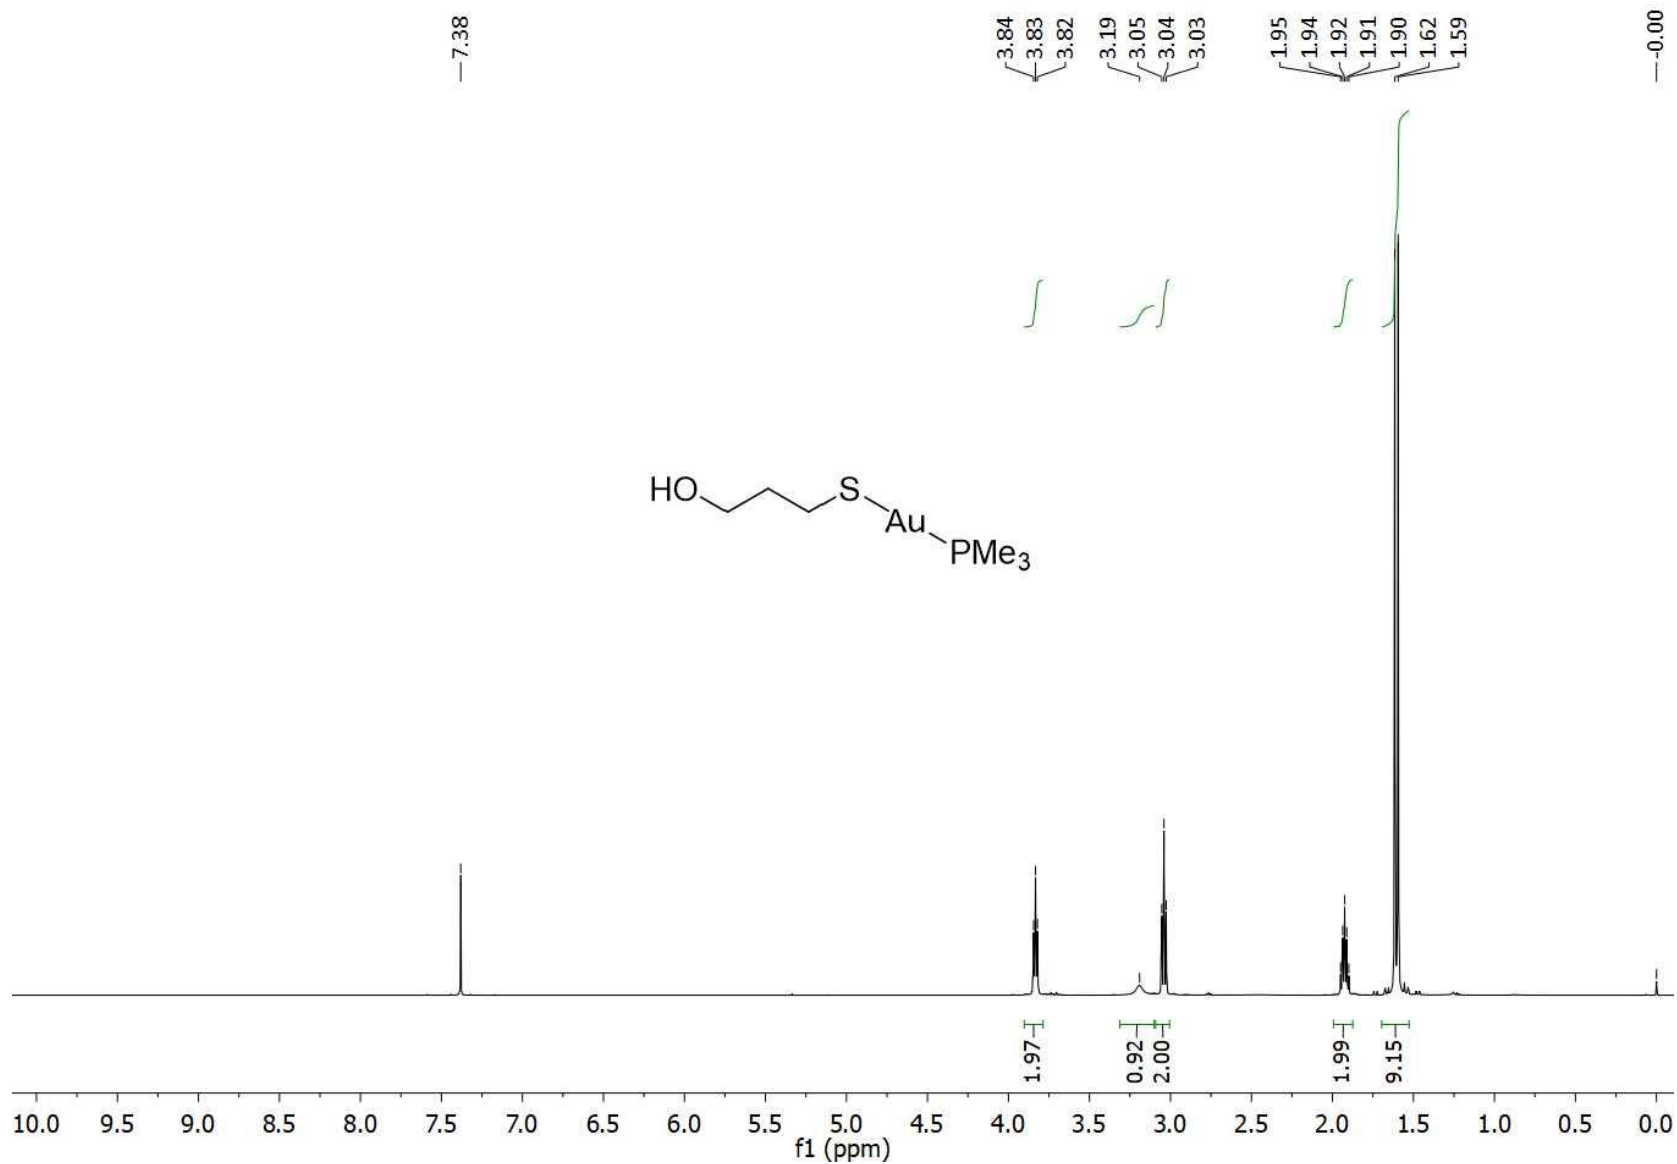

**Figure S7.**  $^1\text{H}$  NMR spectrum of compound **WB-19-HL4172** in CDCl<sub>3</sub>.

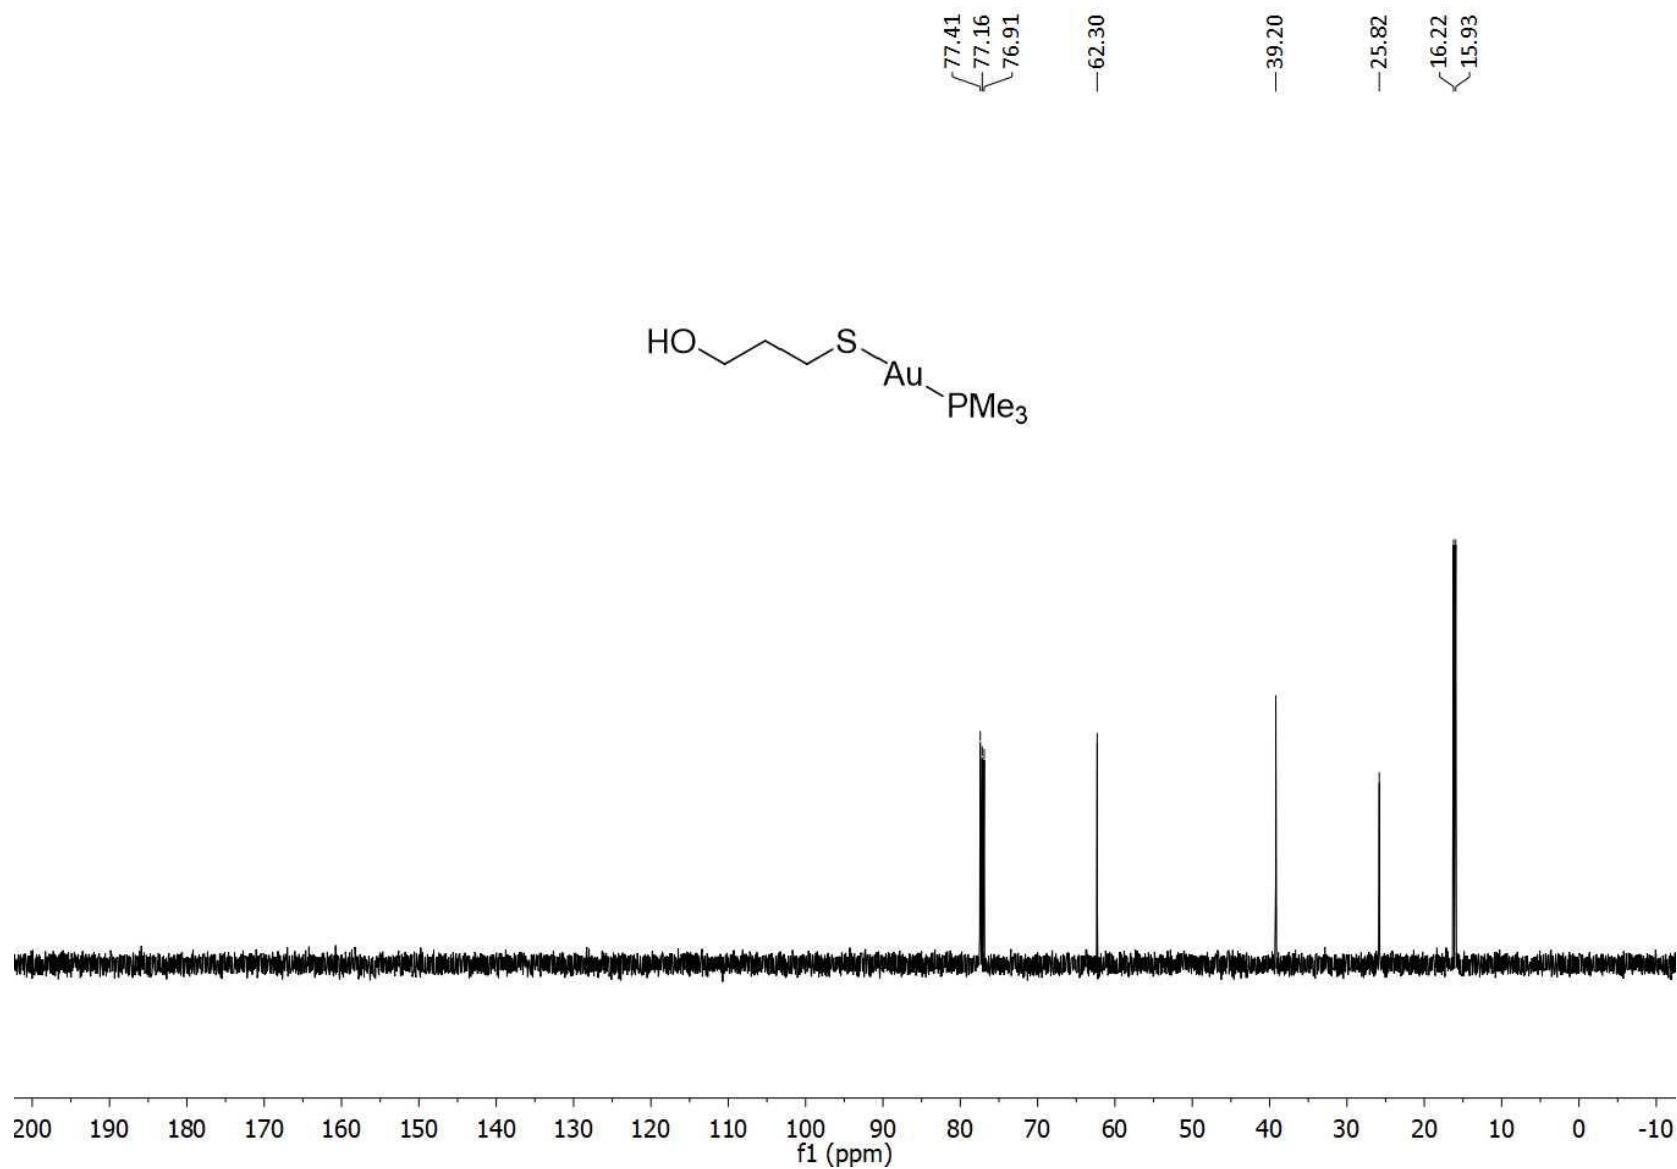

**Figure S8.**  $^{13}\text{C}$  NMR spectrum of compound **WB-19-HL4172** in CDCl<sub>3</sub>.

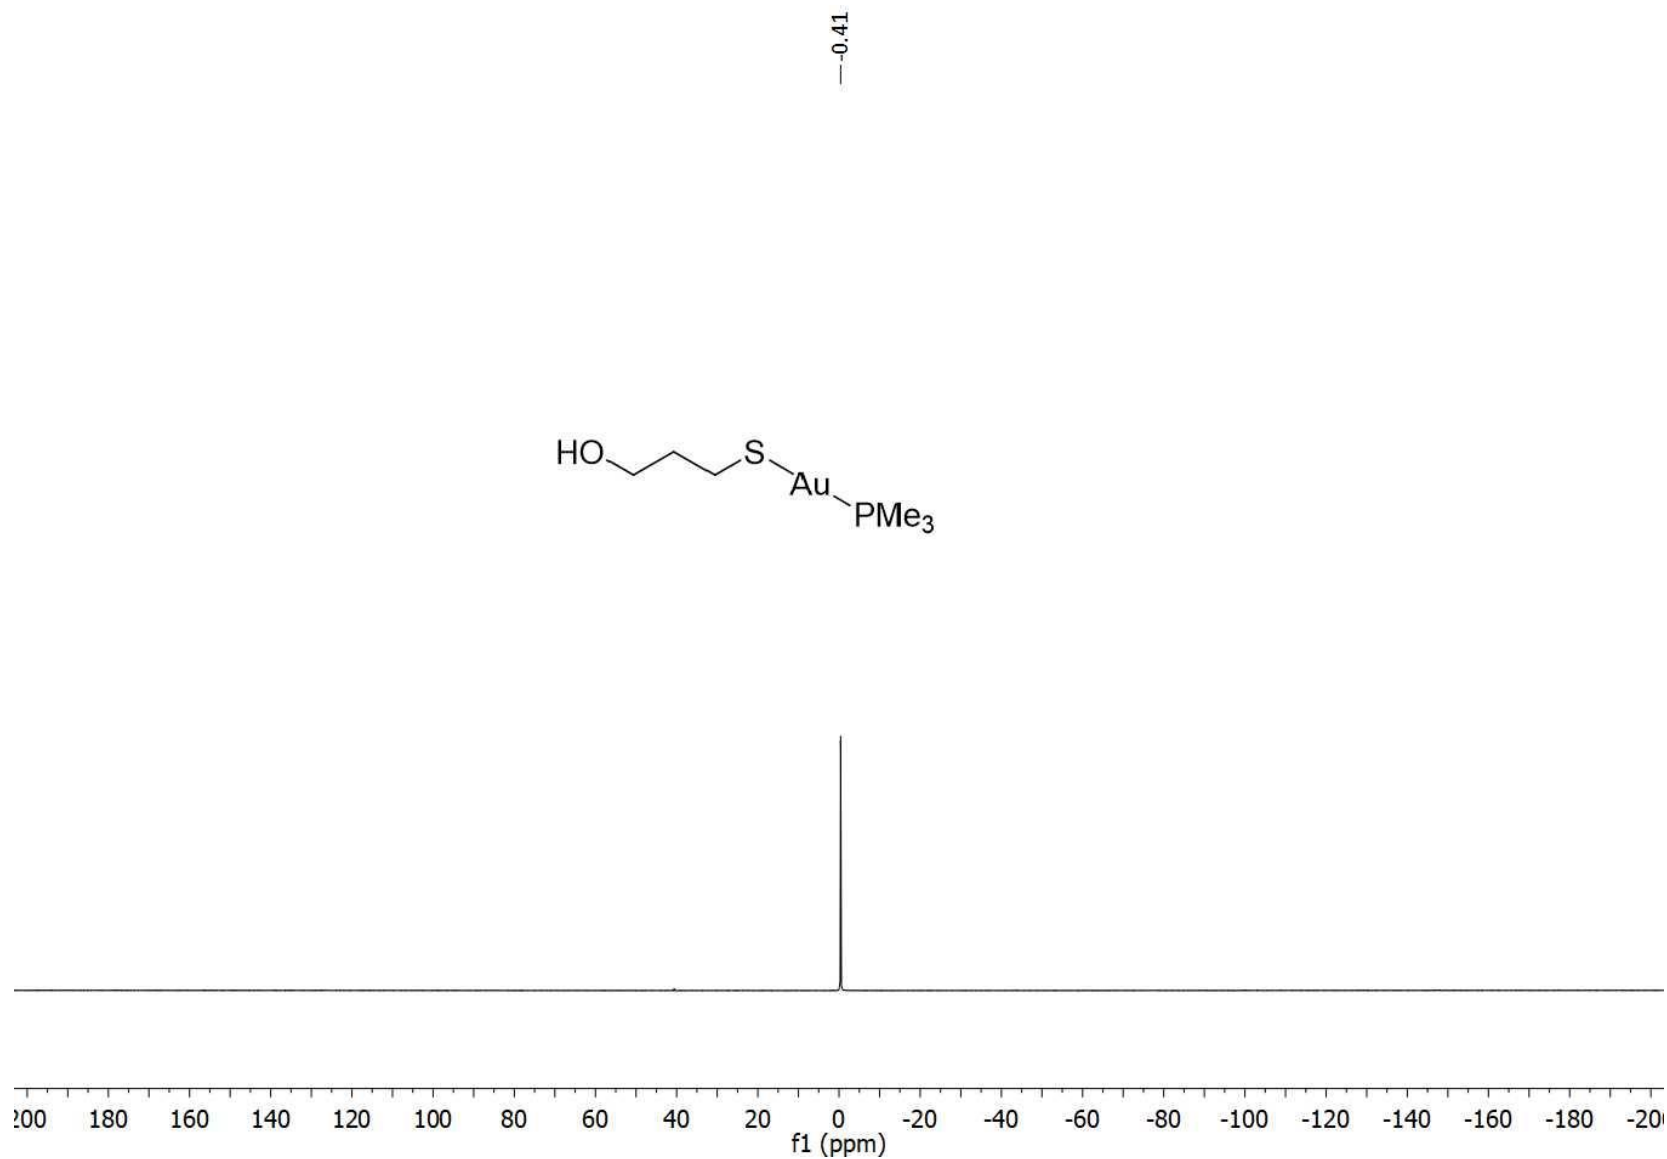

**Figure S9.**  $^{31}\text{P}$  NMR spectrum of compound **WB-19-HL4172** in  $\text{CDCl}_3$ .

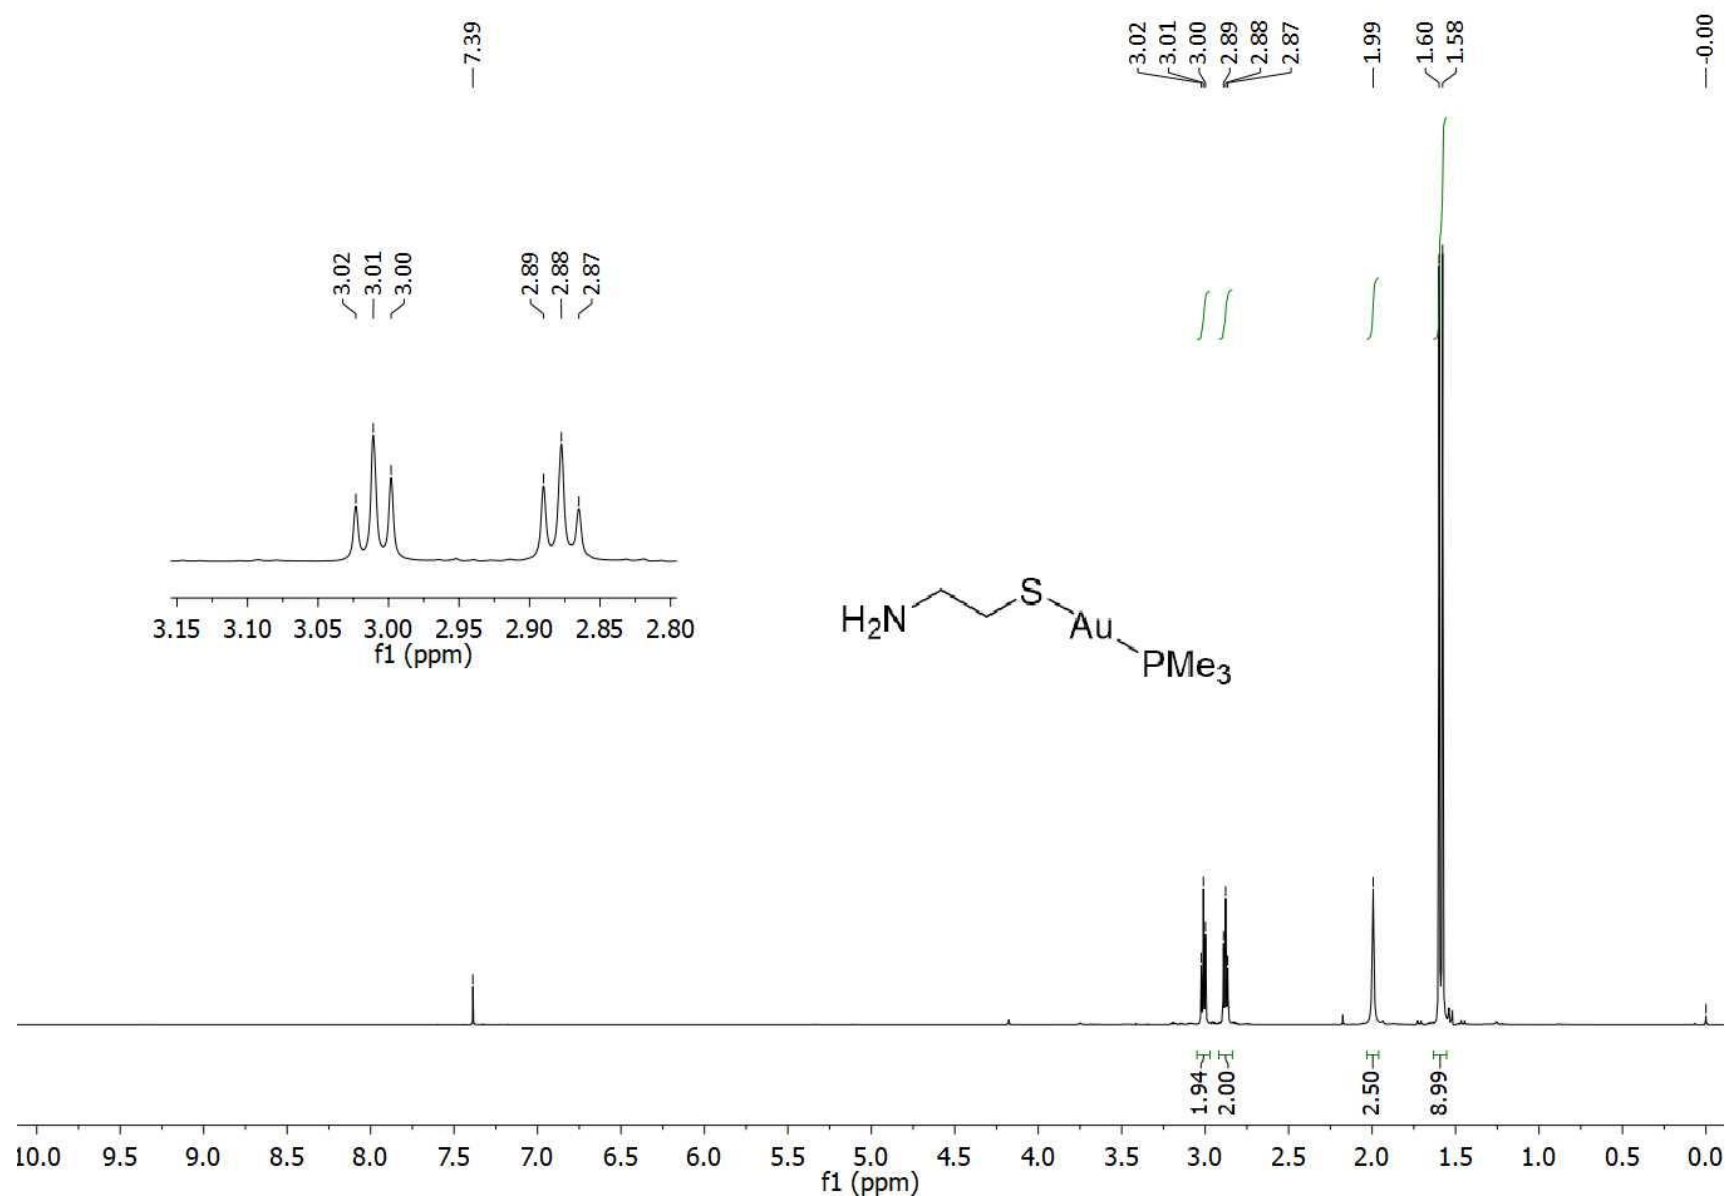

**Figure S10.**  $^1\text{H}$  NMR spectrum of compound **WB-19-HL4181** in  $\text{CDCl}_3$ .

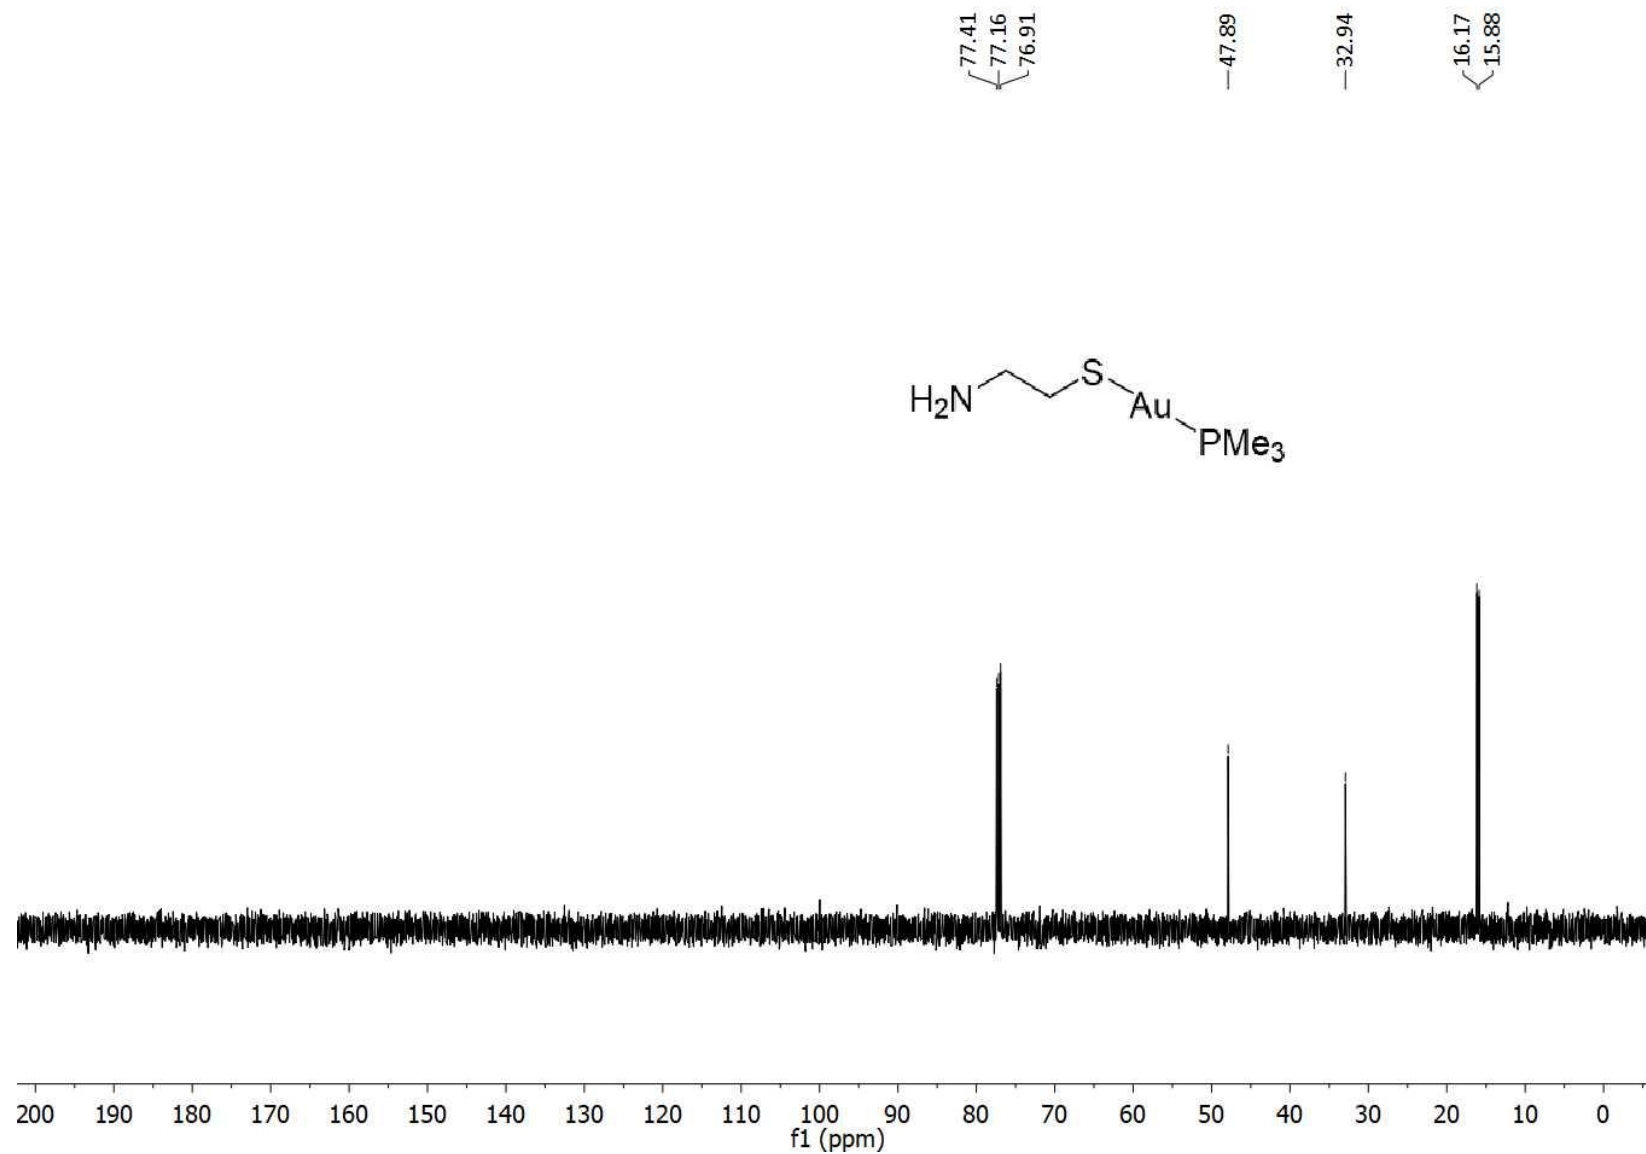

**Figure S11.**  $^{13}\text{C}$  NMR spectrum of compound **WB-19-HL4181** in  $\text{CDCl}_3$ .

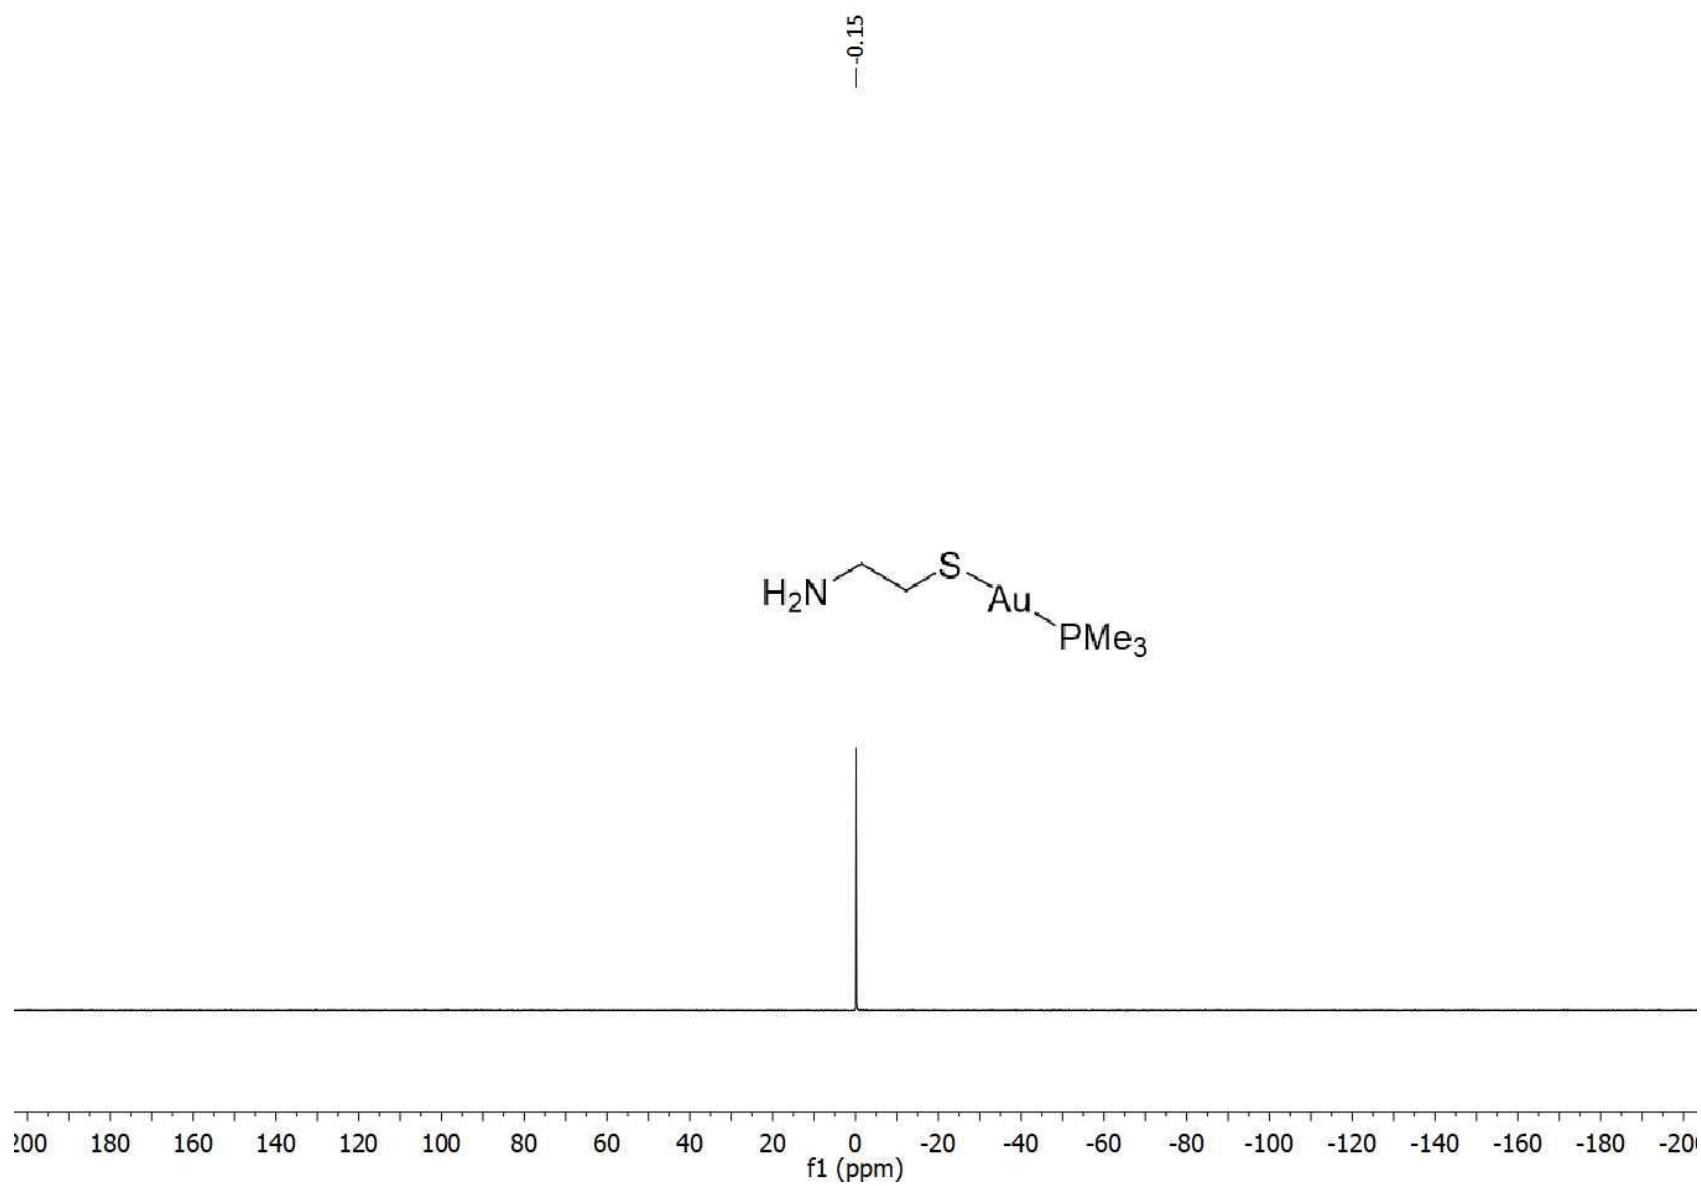

**Figure S12.**  $^{31}\text{P}$  NMR spectrum of compound **WB-19-HL4181** in  $\text{CDCl}_3$ .

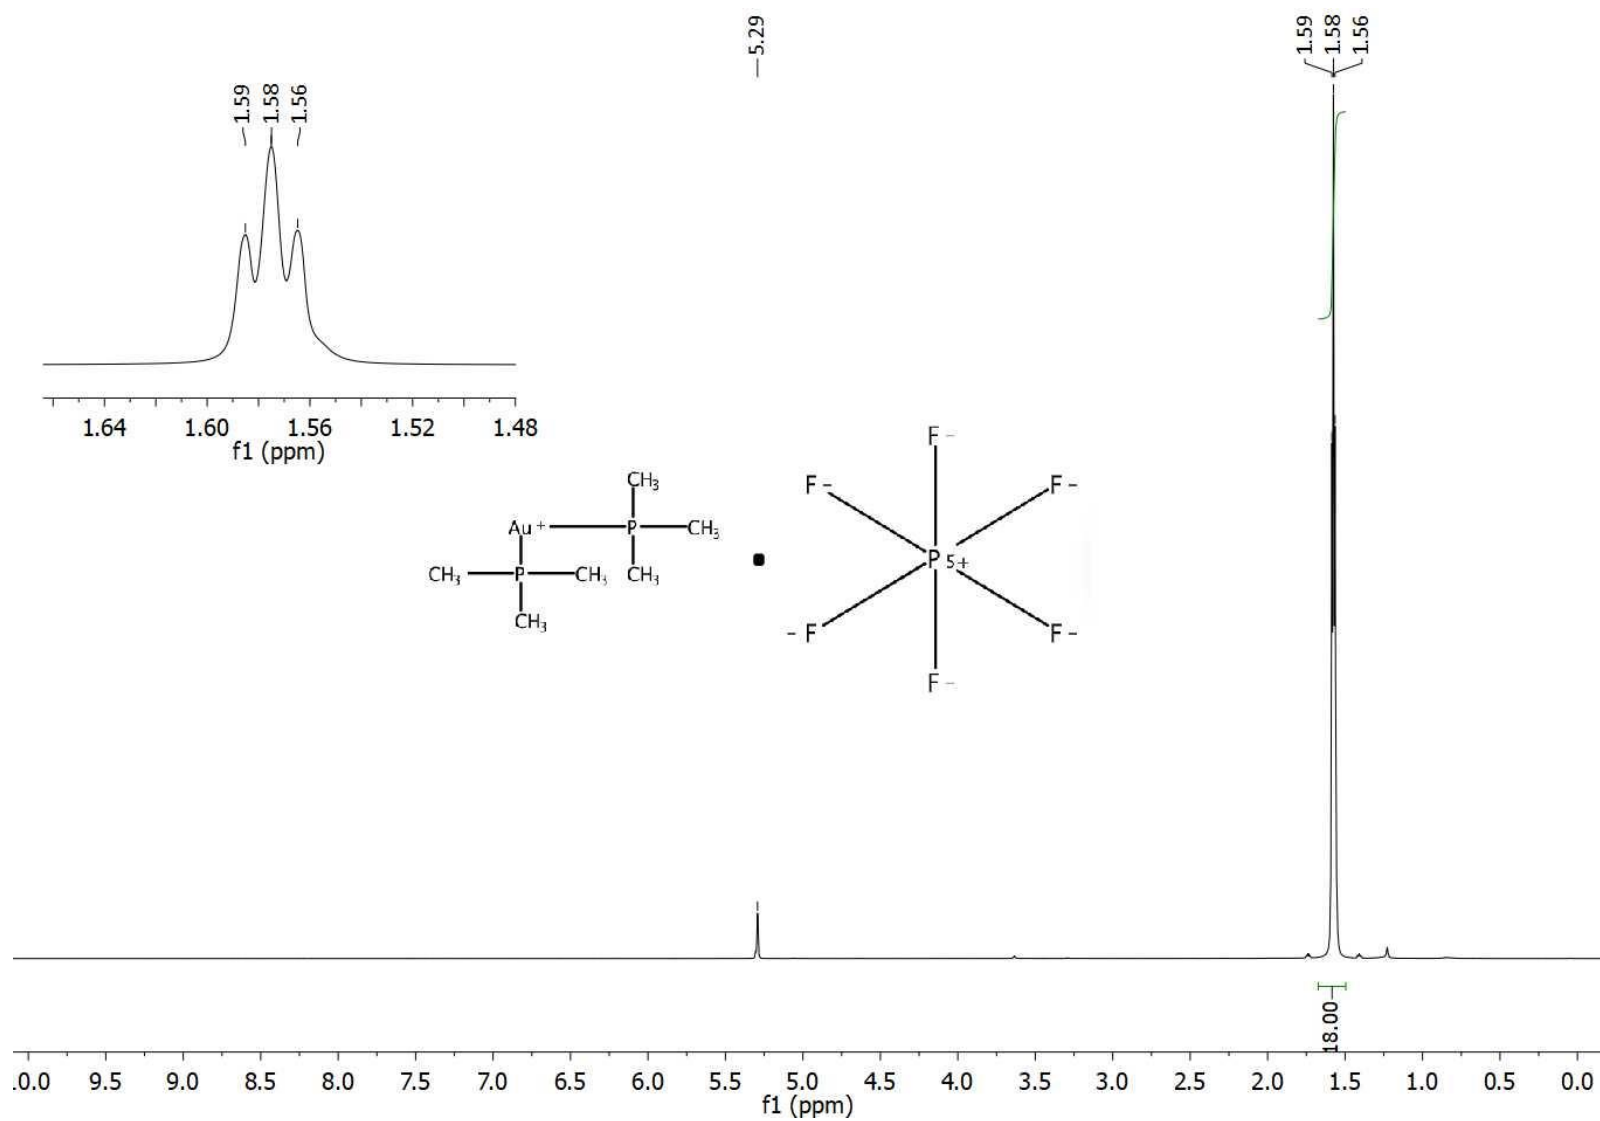

**Figure S13.**  $^1\text{H}$  NMR spectrum of compound **WB-19-HL4121a** in  $\text{CD}_2\text{Cl}_2$ .



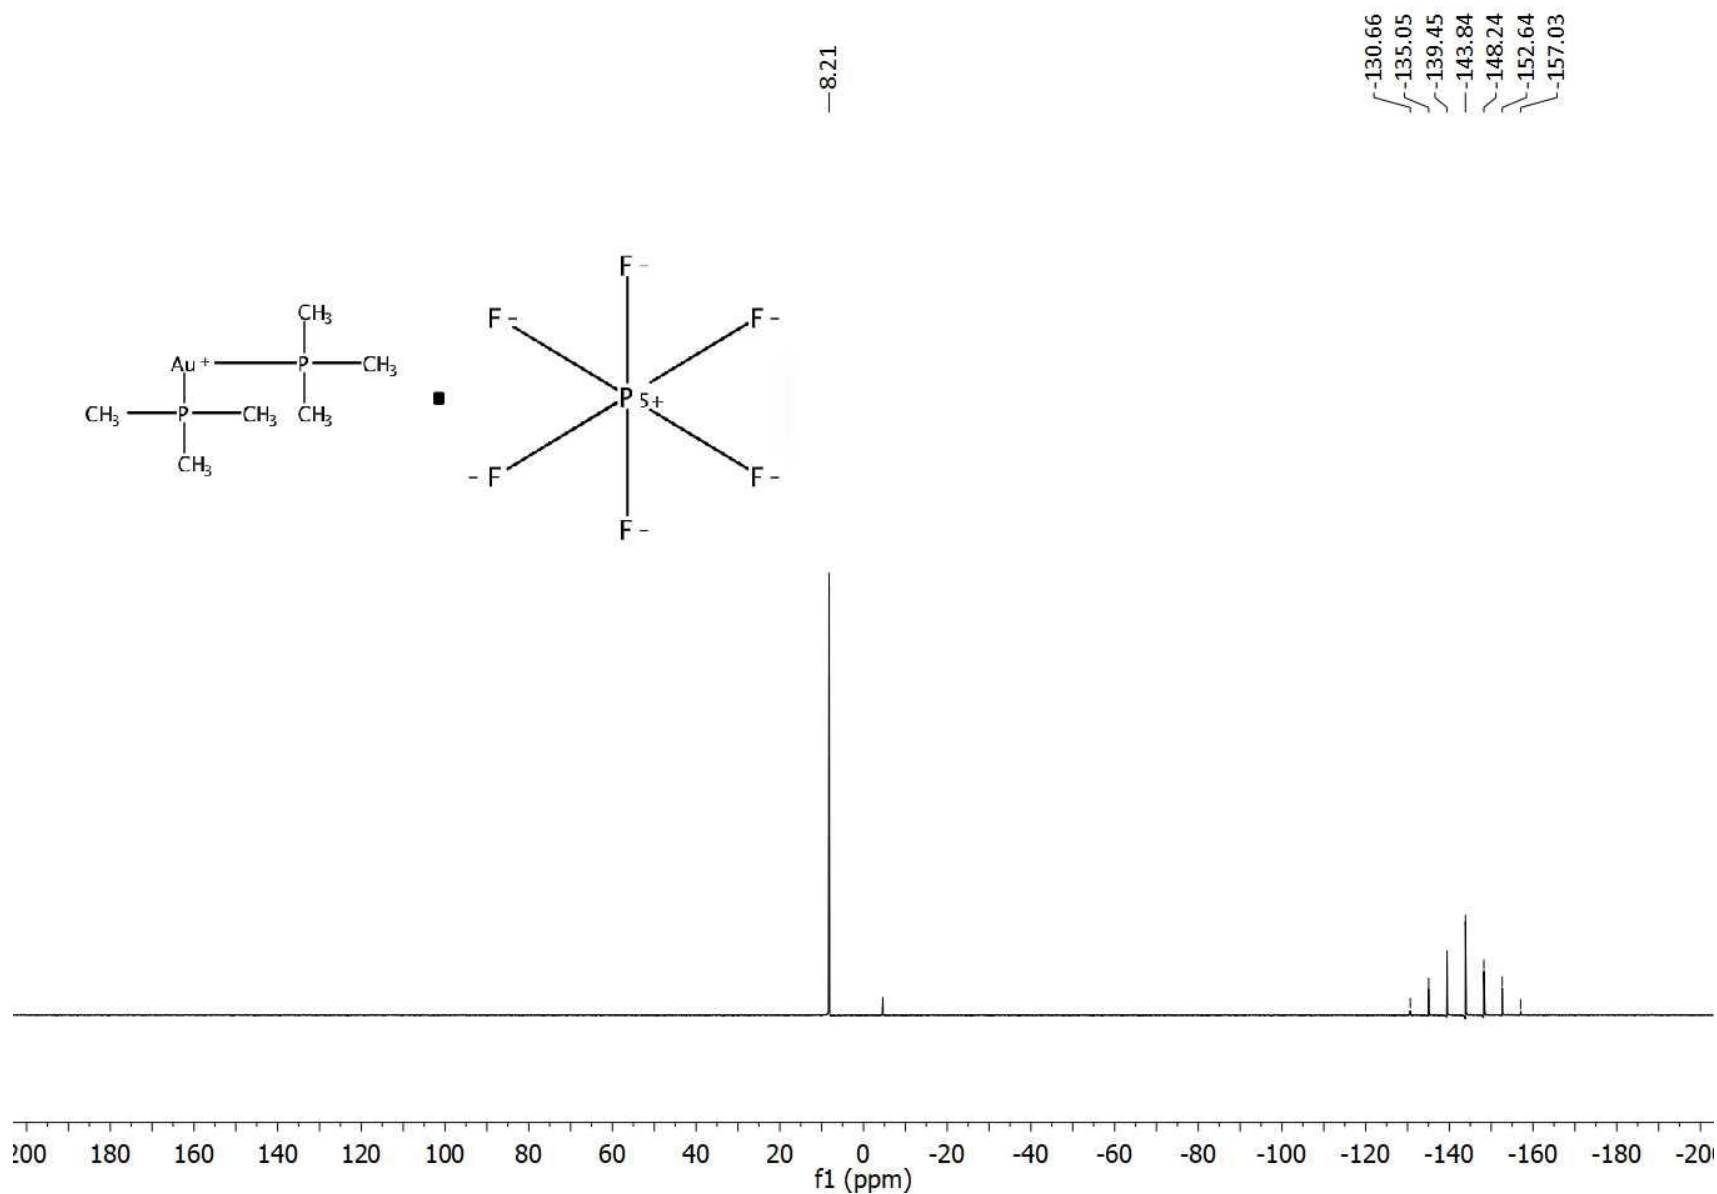

**Figure S14.**  $^{31}\text{P}$  NMR spectrum of compound **WB-19-HL4121a** in  $\text{CD}_2\text{Cl}_2$ .

## **References**

1. Darling P, Chan M, Cox AD, Sokol PA. 1998. Siderophore production by cystic fibrosis isolates of *Burkholderia cepacia*. *Infection and immunity* 66:874–877.
2. Nunvar J, Kalferstova L, Bloodworth RA, Kolar M, Degrossi J, Lubovich S, Cardona ST, Drevinek P. 2016. Understanding the Pathogenicity of *Burkholderia contaminans*, an Emerging Pathogen in Cystic Fibrosis. *PloS one* 11:e0160975.
3. Schmidt S, Blom JF, Pernthaler J, Berg G, Baldwin A, Mahenthiralingam E, Eberl L. 2009. Production of the antifungal compound pyrrolnitrin is quorum sensing-regulated in members of the *Burkholderia cepacia* complex. *Environ Microbiol* 11:1422–1437.
4. Yabuuchi E, Kawamura Y, Ezaki T, Ikedo M, Dejsirilert S, Fujiwara N, Naka T, Kobayashi K. 2000. *Burkholderia uboniae* Sp. Nov., L -Arabinose-Assimilating but Different from *Burkholderia thailandensis* and *Burkholderia vietnamiensis*. *Microbiology and Immunology* 44:307–317.
5. Roy PH, Tetu SG, Larouche A, Elbourne L, Tremblay S, Ren Q, Dodson R, Harkins D, Shay R, Watkins K, Mahamoud Y, Paulsen IT. 2010. Complete Genome Sequence of the Multiresistant Taxonomic Outlier *Pseudomonas aeruginosa* PA7. *PLOS ONE* 5:e8842.
